# Supplementary material
Source: publisher site journal article supplement (https://www.dovepress.com/article/601942)
Supplement: Supplementary file 1 [file 601942%20Supplementary%20Materials.docx]

**Table S1 Predictive value of hemoglobin trajectory, g/L**

| **Gestational age** | **Trajectory 1** | **Trajectory 2** | **Trajectory 3** |
| --- | --- | --- | --- |
| 0 | 149.65 | 138.97 | 117.79 |
| 1 | 147.94 | 137.70 | 117.37 |
| 2 | 146.22 | 136.44 | 116.95 |
| 3 | 144.52 | 135.19 | 116.54 |
| 4 | 142.82 | 133.95 | 116.13 |
| 5 | 141.13 | 132.72 | 115.74 |
| 6 | 139.45 | 131.51 | 115.36 |
| 7 | 137.80 | 130.32 | 114.99 |
| 8 | 136.16 | 129.15 | 114.65 |
| 9 | 134.54 | 128.01 | 114.33 |
| 10 | 132.95 | 126.91 | 114.03 |
| 11 | 131.39 | 125.84 | 113.77 |
| 12 | 129.86 | 124.80 | 113.53 |
| 13 | 128.36 | 123.81 | 113.33 |
| 14 | 126.90 | 122.86 | 113.17 |
| 15 | 125.47 | 121.96 | 113.04 |
| 16 | 124.09 | 121.11 | 112.96 |
| 17 | 122.75 | 120.32 | 112.93 |
| 18 | 121.47 | 119.59 | 112.94 |
| 19 | 120.23 | 118.92 | 113.00 |
| 20 | 119.04 | 118.31 | 113.12 |
| 21 | 117.91 | 117.78 | 113.30 |
| 22 | 116.84 | 117.32 | 113.53 |
| 23 | 115.83 | 116.93 | 113.83 |
| 24 | 114.89 | 116.62 | 114.19 |
| 25 | 114.01 | 116.40 | 114.62 |
| 26 | 113.20 | 116.26 | 115.12 |
| 27 | 112.46 | 116.21 | 115.70 |
| 28 | 111.80 | 116.26 | 116.35 |
| 29 | 111.22 | 116.40 | 117.09 |
| 30 | 110.72 | 116.65 | 117.90 |
| 31 | 110.30 | 117.00 | 118.80 |
| 32 | 109.97 | 117.45 | 119.79 |
| 33 | 109.73 | 118.02 | 120.87 |
| 34 | 109.58 | 118.70 | 122.04 |
| 35 | 109.53 | 119.50 | 123.31 |
| 36 | 109.57 | 120.42 | 124.68 |
| 37 | 109.72 | 121.46 | 126.16 |
| 38 | 109.96 | 122.63 | 127.73 |
| 39 | 110.32 | 123.94 | 129.42 |
| 40 | 110.78 | 125.37 | 131.22 |
| 41 | 111.36 | 126.95 | 133.13 |
| 42 | 112.04 | 128.67 | 135.15 |

**Table S2 Association between Hb cutoffs at 28-32 weeks and PPH**

| Hb cutoff*, g/L | Model 1α | *P* |
| --- | --- | --- |
| 110 | **1.78 (1.14, 2.74)** | **0.010** |
| 111 | **1.82 (1.18, 2.79)** | **0.006** |
| 112 | **1.85 (1.21, 2.82)** | **0.004** |
| 113 | **1.97 (1.30, 3.00)** | **0.001** |
| 114 | **1.75 (1.15, 2.66)** | **0.009** |
| 115 | **1.61 (1.06, 2.45)** | **0.026** |
| 116 | **1.64 (1.08, 2.52)** | **0.021** |
| 117 | 1.47 (0.96, 2.25) | 0.076 |
| 118 | 1.23 (0.81, 1.90) | 0.331 |

*Odds ratio of PPH for women with hemoglobin value below the cutoff, compared with those with hemoglobin value above the cutoff.

αAdjusted for age, pre-delivery BMI, gestational age, primiparity, gravidity, caesarean section, history of caesarean section, and placenta previa.

Bold text: *P* <0.05.
